# Supplementary material
Source: Springer Nature journal article supplement (https://www.springermedizin.de/resource/supplementary/13058_2013_3456_MOESM10_ESM.pdf/9704078)
Supplement: MOESM10 [file 9704078]

**Supplementary Table 5: Clinical, pathological characteristics and treatments of patients and tumors of the two genomic sub-groups of IMPC.**

|                         | <b>Sawtooth / 8/16 /</b><br><b>[n (%)]</b> | <b>Firestorm/Amplifier/</b><br><b>[n (%)]</b> | <b><i>p-val</i></b>  |
|-------------------------|--------------------------------------------|-----------------------------------------------|----------------------|
| Number of patients      | 16                                         | 19                                            |                      |
| Median FU, yrs [range]  | 5.9 [0.6 - 10.2 ]                          | 7.5 [1.1 - 10.7]                              |                      |
| Median age, yrs [range] | 61 [39 - 84]                               | 62 [34 - 83]                                  |                      |
| < 50                    | 1 (6)                                      | 6 (32)                                        | ns                   |
| > 50                    | 15 (94)                                    | 13 (68)                                       |                      |
| Tumor size, cm          |                                            |                                               |                      |
| < 2                     | 12 (75)                                    | 12 (63)                                       | ns                   |
| 2 to 5                  | 3 (19)                                     | 6 (32)                                        | ns                   |
| > 5                     | 1 (6)                                      | 1 (5)                                         | ns                   |
| Grade                   |                                            |                                               |                      |
| I                       | 2 (13)                                     | 0 (0)                                         | ns                   |
| II                      | 7 (44)                                     | 11 (58)                                       | ns                   |
| III                     | 7 (44)                                     | 7 (37)                                        | ns                   |
| Not specified           | 0 (0)                                      | 1 (5)                                         |                      |
| Nodal status            |                                            |                                               |                      |
| Positive                | 9 (56)                                     | 11 (58)                                       | ns                   |
| Negative                | 6 (38)                                     | 7 (37)                                        |                      |
| Not specified           | 1 (6)                                      | 1 (5)                                         |                      |
| Lyhovoascular invasion  |                                            |                                               |                      |
| Positive                | 14 (88)                                    | 15 (79)                                       | ns                   |
| Negative                | 2 (13)                                     | 3 (16)                                        |                      |
| Not specified           | 0 (0)                                      | 1 (5)                                         |                      |
| Conservative surgery    | 11 (69)                                    | 10 (53)                                       | ns                   |
| Adjuvant therapies      |                                            |                                               |                      |
| Anti-HER2 therapy       | 1 (100)                                    | 4 (44)                                        | ns                   |
| Chemotherapy            | 6 (38)                                     | 12 (63)                                       | ns                   |
| Hormone treatment       | 15 (94)                                    | 16 (84)                                       | ns                   |
| ER                      |                                            |                                               |                      |
| Positive                | 16 (100)                                   | 19 (100)                                      | ns                   |
| Negative                | 0 (0)                                      | 0 (0)                                         |                      |
| ERBB2                   |                                            |                                               |                      |
| Positive                | 1 (6)                                      | 9 (47)                                        | $7.3 \times 10^{-3}$ |
| Negative                | 13 (81)                                    | 9 (47)                                        |                      |
| Not specified           | 2 (13)                                     | 1 (5)                                         |                      |
